# Supplementary material for: CMIP as a novel candidate gene for neurodevelopmental and neuropsychiatric disorders
Source: Research Square preprint supplement (doi:10.21203/rs.3.rs-8316803/v1), 2026-01-16
Supplement: Supplementary file 1 [file cdf626dd2d5c5f51272b6efb.docx]

| **Subject** |
| --- |
| **family** |
| **Centre** |
| **Year of birth** |
| **Family_subject** |
| **Hospital/center** |
| **published?** |
| **references** |
| **Gender** |
| **Etnicity** |
| **CNV or SNV** |
| **span of deleted region (kb)** |
| **genes included in the deletion** |
| **genomic position of deletion/variant** |
| **Variant c. position** |
| **Variant p. position** |
| **Type of variant** |
| **Inheritance** |
| **domain involved, deleted if not whole gene** |
| **ACMG classification** |
| **genetic test used** |
| **age at genetic analysis (years)** |
| **other genetic test performed: yes/no** |
| **which genetic tests performed?** |
| **Perinatal history** |
| **preterm born** |
| **neonatal complications** |
| **pregnancy complications** |
| **Hypotonia in perinatal period?** |
| **History of kidney disease? (Yes/No, if yes: please specify)** |
| **History of oncology/immune-mediated diseases? (Yes/No, if yes: please specify,age)** |
| **GERD** |
| **Obstipation** |
| **FTT** |
| **gastrostomy or nasogastric feeding, after neonatal period** |
| **Other gastro-intestinal problems** |
| **Biometry at birth (+ P-value)** |
| **Microcephalic at birth? (Yes/No)** |
| **other abnormalities in biometry at birth** |
| **Family history (including psychiatric, febrile seizures, ID and epilepsy)** |
| **Consanguinity of parents?** |
| **epilepsy?** |
| **Age at seizure onset (years)** |
| **Type of seizures at onset** |
| **Other seizures (GTCS, focal, absences, myoclonic, tonic, atonic, other: please specify)** |
| **Type of seizures experienced currently** |
| **Seizure frequency currently (or time of seizure-freedom)** |
| **other epilepsy details** |
| **History of status epilepticus (Yes/No)** |
| **Details of status epilepticus (e.g. type, number of episodes, frequency)** |
| **Seizure triggers** |
| **Seizure frequency at onset** |
| **Evolution of seizures (worse, same, better)** |
| **Developmental delay? (Yes/No) (age of onset)** |
| **Developmental delay after seizure-onset? (Yes/no)** |
| **age of onset DD (months)** |
| **Severity of ID** |
| **Regression of development?** |
| **developmental milestones delayed?** |
| **Developmental milestones details (sitting, walking, first words) (age)** |
| **Learning problems (reading, speaking, others (age, plaease specify)** |
| **Language (normal; abnormal, please specify)** |
| **Behavior problems/agression (age)** |
| **ASD features** |
| **ADHD features?** |
| **Other psychiatric features** |
| **Diabetes? (Yes/No, if yes: please specify)** |
| **Sleeping problems** |
| **All antiseizure medication ever tried** |
| **Current antiseizure medication** |
| **Antiseizure medication that worsened seizures** |
| **Antiseizure medication with clear seizure-reduction (>50%)** |
| **Drug resistant (yes/no)** |
| **Other current regular medications** |
| **Age at last evaluation (y)** |
| **Neurological examination (at last follow-up)** |
| **ataxia present?** |
| **Visual problems (ophtalmologic evaluation?)** |
| **Mobility/gait** |
| **Facial dysmorphic features** |
| **Other dysmorphic features (pes equinovarus, midline defects, contractures, others)** |
| **Biometry: weight, height, head circumference, BMI (age)** |
| **bmi** |
| **Obesitas/underweight present (+-2SD) (Yes/No) (defined as bmi < or > p3 p97 or weight)** |
| **height percentile** |
| **macro or microcephalie current** |
| **MRI brain (age)** |
| **IQ testing (results, name of test, age of testing)** |
| **EEG at seizure-onset (age)** |
| **Other EEG (age)** |
| **EEG background** |
| **EEG summary (focal, gen or both)** |
| **EEG important features** |
| **ECG abnormalities? (if yes, please specify) (age)** |
| **Metabolic work-up (including…)** |
| **Liver enzymes** |
| **Renal function/ultrasound** |
| **Remarks** |
